# Supplementary material for: Fixed vs. variable light quality in vertical farming: Impacts on vegetative growth and nutritional quality of lettuce
Source: PLoS One. 2023 May 17;18(5):e0285180. doi: 10.1371/journal.pone.0285180 (PMC10191339; doi:10.1371/journal.pone.0285180)
Supplement: S1 Data — (XLSX) [file pone.0285180.s001.xlsx]

## Sheet: Sheet1
Variety	Light Quality	Lighting Method	Exp	Rep	SDW	LA	CA_21	Antho	Beta-Car		Light Quality	Exp	Rep	Intensity (μmol/m2/s)
Green	High Blue	Variable	1	1	6.07828	1742	.	.	4.5224					Red	Blue	Total
Green	High Blue	Variable	1	2	6.55592	1660	.	.	6.2156		Low Blue	1	1	115.4	10.2	125.6
Green	High Blue	Variable	1	3	7.72603	1826	.	.	4.53096		Low Blue	1	2	119.5	8.9	128.4
Green	High Blue	Variable	1	4	6.86893	1809	.	.	6.72008		Low Blue	1	3	116.4	8.8	125.2
Green	High Blue	Fixed	1	1	4.22574	1414	.	.	5.20576		Low Blue	1	4	113.6	10.7	124.3
Green	High Blue	Fixed	1	2	5.55596	1596	.	.	7.81008		Low Blue	2	1	122.8	11.7	134.5
Green	High Blue	Fixed	1	3	5.38267	1742	.	.	7.58568		Low Blue	2	2	118.5	12.2	130.7
Green	High Blue	Fixed	1	4	5.43768	1581	.	.	6.84136		Low Blue	2	3	121.2	12.3	133.5
Green	Low Blue	Variable	1	1	6.41477	1542	.	.	7.21408		High Blue	1	1	69.9	62.7	132.6
Green	Low Blue	Variable	1	2	7.15302	1721	.	.	7.75608		High Blue	1	2	73.5	64.5	138
Green	Low Blue	Variable	1	3	6.05452	1666	.	.	6.43808		High Blue	1	3	66.8	62.5	129.3
Green	Low Blue	Variable	1	4	5.84934	1702	.	.	6.26408		High Blue	1	4	68.6	60.5	129.1
Green	Low Blue	Fixed	1	1	7.7386	1814	.	.	5.86504		High Blue	2	1	69.9	61.2	131.1
Green	Low Blue	Fixed	1	2	7.36311	1701	.	.	4.97752		High Blue	2	2	71.4	64.4	135.8
Green	Low Blue	Fixed	1	3	8.03867	1812	.	.	7.8652		High Blue	2	3	68.8	60.4	129.2
Green	Low Blue	Fixed	1	4	6.59572	1775	.	.	3.85824
Green	High Blue	Variable	2	1	4.85	1337.89	246.355	0.013	4.28408
Green	High Blue	Variable	2	2	3.94	1033.4	270.198	0.008	4.5024
Green	High Blue	Variable	2	3	3.54	1066.61	255.626	0.009	4.27048
Green	High Blue	Fixed	2	1	3.7	1177.9	218.959	0.016	5.11576
Green	High Blue	Fixed	2	2	4.01	1325.7	298.702	0.014	4.57648
Green	High Blue	Fixed	2	3	2.68	945.3	217.801	0.011	6.00144
Green	Low Blue	Variable	2	1	4.58	1215.69	277.215	0.009	4.70424
Green	Low Blue	Variable	2	2	4.51	1123.3	322.714	0.016	6.35872
Green	Low Blue	Variable	2	3	5.08	1280.7	244.342	0.02	4.7212
Green	Low Blue	Fixed	2	1	4.24	1270.61	312.504	0.005	4.70528
Green	Low Blue	Fixed	2	2	5.22	1326	299.522	0.011	3.85616
Green	Low Blue	Fixed	2	3	4.22	1261.1	382.406	0.021	4.93304
Red	High Blue	Variable	1	1	1.27193	574	.	.	2.84192
Red	High Blue	Variable	1	2	2.80097	892	.	.	3.2516
Red	High Blue	Variable	1	3	2.22736	761	.	.	4.45768
Red	High Blue	Variable	1	4	2.03762	854	.	.	2.05576
Red	High Blue	Fixed	1	1	1.13859	457	.	.	1.70264
Red	High Blue	Fixed	1	2	1.76907	791	.	.	3.59632
Red	High Blue	Fixed	1	3	1.40458	666	.	.	3.49224
Red	High Blue	Fixed	1	4	1.29724	731	.	.	2.29688
Red	Low Blue	Variable	1	1	1.57361	886	.	.	4.7336
Red	Low Blue	Variable	1	2	2.78997	900	.	.	3.17616
Red	Low Blue	Variable	1	3	1.77371	735	.	.	2.23816
Red	Low Blue	Variable	1	4	1.41706	865	.	.	2.71688
Red	Low Blue	Fixed	1	1	2.80892	930	.	.	2.7984
Red	Low Blue	Fixed	1	2	2.15788	656	.	.	2.06864
Red	Low Blue	Fixed	1	3	2.46846	801	.	.	2.21232
Red	Low Blue	Fixed	1	4	2.28117	802	.	.	2.8592
Red	High Blue	Variable	2	1	0.25	281.5	87.9451	1.044	2.48944
Red	High Blue	Variable	2	2	0.73	507.6	146.068	1.067	2.38296
Red	High Blue	Variable	2	3	1.08	540.7	103.546	1.091	2.16824
Red	High Blue	Fixed	2	1	1.32	702.4	.	1.397	3.4928
Red	High Blue	Fixed	2	2	0.99	526.8	110.008	1.069	3.14976
Red	High Blue	Fixed	2	3	1.31	654.4	94.2329	1.095	2.78032
Red	Low Blue	Variable	2	1	0.81	476.7	150.705	1.073	2.5544
Red	Low Blue	Variable	2	2	1.22	582.1	122.218	1.089	2.69576
Red	Low Blue	Variable	2	3	2.11	739.8	168.387	1.481	3.00848
Red	Low Blue	Fixed	2	1	2.12	826.9	196.493	1.065	1.90368
Red	Low Blue	Fixed	2	2	1.56	625.5	155.87	1.055	2.7208
Red	Low Blue	Fixed	2	3	1.46	587.7	149.512	1.196	2.2364
